# Supplementary material for: A Multigene Assay to Predict Recurrence of Tamoxifen-Treated, Node-Negative Breast Cancer
Source: Atypon-hosted journal article supplement (doi:10.1056/nejmoa041588), 2004-12-10

## Supplementary Appendix

This appendix has been provided by the authors to give readers additional information about their work.

Supplement to: Paik S, Shak S, Tang G, et al. A multigene assay to predict recurrence of tamoxifen-treated node-negative breast cancer. *N Engl J Med* 2004;351:2817-26.

## Supplemental Background and Methods

### Section I. Detailed Assay Methods

#### Sample Preparation

All sample preparation was performed at the NSABP Division of Pathology. We reviewed all the blocks from tamoxifen-treated patients in NSABP B-14 that were currently in the NSABP Tumor Bank. A section was cut, using a Histo Collimator (Microm International) and Paraffin Sectioning Aid (Instrumedics, Hackensack, NJ) to minimize tissue usage, stained with Hematoxylin and Eosin, and reviewed by the NSABP and Genomic Health pathologists. Cases with no cancer (depleted by prior tissue studies) or with cancer cells occupying <5% of the section area were excluded from the study. The blocks in 79 patients had insufficient tumor and did not meet the protocol eligibility criteria. Macro-dissection to obtain enriched tumor tissue was performed using a safety blade cleaned with RNaseZAP (Ambion, Austin, TX) on sections having non-tumor elements (such as smooth muscle, fibrosis, hemorrhage, normal breast stromal tissue, but not DCIS or LCIS or necrosis) that were both sufficiently localized to be amenable to macro-dissection and constituted >50% of the overall tissue area of the section. RNA was

extracted from three 10 micron thick sections without dissection or from macro-dissected tumor from six 10 micron sections. Cut sections were placed into 1.5 ml RNase/DNase-free microfuge tubes (PGC Scientific, Frederick, MD), labeled with a bar-code (blinding the sample), and shipped at ambient temperature to the reference laboratory at Genomic Health, Inc.

### Gene Expression

Gene expression in fixed paraffin embedded tumor tissue was performed by the methods recently described by Cronin et al (22). Paraffin was removed from specimens by xylene extraction followed by ethanol washes. RNA was isolated using the Epicentre Technologies, Inc. MasterPure™ kit (Madison, WI). DNase I treatment is routinely included in the extraction step. Total RNA content was measured using Ribogreen® Fluorescence Quantitation Kit (Molecular Probes, Inc., Eugene, OR). Residual genomic DNA contamination was assayed by a quantitative TaqMan® PCR assay for  $\beta$ -actin DNA, which includes both positive and negative controls. Samples with contaminating DNA were re-subjected to DNase I treatment, and assayed again for DNA contamination.

Reverse transcription of the purified RNA was carried out with the Omniscript RT kit (Qiagen, Valencia, CA) for first strand synthesis, using simultaneous random hexamer and gene-specific priming. TaqMan® reactions were carried out in 384 well plates according to instructions of the manufacturer, using Applied Biosystems PRISM® 7900HT instruments. Expression of each gene was measured (the number of cycles required to achieve a threshold, or  $C_T$ ) in triplicate, aggregated, and then normalized relative to a set of five reference genes [beta-actin (or ACTB), GAPDH (or GAPD), GUS (or GUSB), RPLPO, and TFRC] by subtracting the average of the expression of the 5 reference genes. Reference-normalized expression measurements range from 0 to 15, where a one unit increase reflects approximately a 2-fold increase in RNA (amplification efficiencies ranged from 75% to 112% for the 21 genes).

Stringent quality specifications were developed for each step of the assay and an RNA standard is used as a calibrator to ensure intra-laboratory accuracy. The accuracy, precision, linearity, analytical sensitivity, dynamic range and reproducibility of the assay as a function of day, machine, and operator were documented as part of the rigorous federally-regulated CLIA review process. Reproducibility within and between blocks was

assessed by measuring expression in 5 serial sections from 6 blocks in 2 patients. The standard deviation for expression of the 16 cancer-related genes in serial sections is 0.07 to 0.21 expression units. The standard deviation within block for the Recurrence Score is 0.72 RS units (95% CI, 0.55, 1.04). The total standard deviation within patient (includes between blocks and within block) is 2.2 RS units. Similar variability in the RS was observed in reanalysis of clinical trial samples on separate days with different reagent lots (data not shown).

## Section 2: Development of the Recurrence Score Assay

To develop and clinically validate a tumor gene expression assay for use with tumor blocks that are routinely prepared following surgery, we used a multi-step approach.

First, a real time RT-PCR method to quantify the expression of hundreds of genes in RNA isolated from three 10 micron sections of fixed paraffin embedded tumor tissue was developed (22). Assay sensitivity, specificity, and reproducibility were characterized and optimized for measurement of fragmented RNA that is extracted from fixed tumor tissue stored for varying periods of time.

Second, we selected 250 candidate genes from the published literature, genomic databases, pathway analysis, and from microarray-based gene expression profiling experiments performed using fresh frozen tissue (17-19, 23). The 250 candidate genes include:

| <b>Table.</b> Listing of the 250 Candidate Genes |                  |
|--------------------------------------------------|------------------|
| Gene Name                                        | Accession Number |
| A-Catenin                                        | NM_001903        |
| ACTG2                                            | NM_001615        |
| AD024                                            | NM_020675        |
| AIB1                                             | NM_006534        |
| AK055699                                         | AK055699         |
| AKAP-2                                           | NM_007203        |

|              |           |
|--------------|-----------|
| AKT1         | NM_005163 |
| AKT2         | NM_001626 |
| AKT3         | NM_005465 |
| ALDH1A1      | NM_000689 |
| ALDH1A3      | NM_000693 |
| APC          | NM_000038 |
| AREG         | NM_001657 |
| B-actin      | NM_001101 |
| B-Catenin    | NM_001904 |
| BAD          | NM_032989 |
| BAG1         | NM_004323 |
| Bak          | NM_001188 |
| Bax          | NM_004324 |
| BBC3         | NM_014417 |
| Bcl2         | NM_000633 |
| Bclx         | NM_001191 |
| BECN1        | NM_003766 |
| BG675392     | BG675392  |
| BIN1         | NM_004305 |
| BRCA1        | NM_007295 |
| BRCA2        | NM_000059 |
| BRK          | NM_005975 |
| BRMS1        | AF159141  |
| BUB1         | NM_004336 |
| C20 orf1     | NM_012112 |
| C20orf103    | NM_012261 |
| CA9          | NM_001216 |
| CCNB1        | NM_031966 |
| CCND1        | NM_001758 |
| CCNE1        | NM_001238 |
| CCNE2        | NM_057749 |
| CD105        | NM_000118 |
| CD18         | NM_000211 |
| CD31         | NM_000442 |
| CD3z         | NM_000734 |
| CD44E        | X55150    |
| CD68         | NM_001251 |
| CD9          | NM_001769 |
| CDC20        | NM_001255 |
| CDC25B       | NM_021874 |
| CDH1         | NM_004360 |
| CEGP1        | NM_020974 |
| CHAF1B       | NM_005441 |
| Chk1         | NM_001274 |
| Chk2         | NM_007194 |
| CIAP1        | NM_001166 |
| clAP2        | NM_001165 |
| cMet         | NM_000245 |
| cMYC         | NM_002467 |
| CNN          | NM_001299 |
| COL1A1       | NM_000088 |
| COL1A2       | NM_000089 |
| Contig 27882 | AK000618  |

|                            |             |
|----------------------------|-------------|
| Contig 36744               | XM_087225   |
| Contig 51037               | XM_058945   |
| Contig44799                | Contig44799 |
| Contig46653                | Contig46653 |
| Contig47405                | Contig47405 |
| COX2                       | NM_000963   |
| CRBP                       | NM_002899   |
| CSK                        | NM_004383   |
| CSTF1                      | NM_001324   |
| CTSB                       | NM_001908   |
| CTSL                       | NM_001912   |
| CTSL2                      | NM_001333   |
| Cyclin G1                  | NM_004060   |
| CYP                        | NM_006347   |
| CYP2C8                     | NM_000770   |
| CYP3A4                     | NM_017460   |
| DAPK1                      | NM_004938   |
| DCR3                       | NM_016434   |
| DHPS                       | NM_013407   |
| DIABLO                     | NM_019887   |
| DKFZp564                   | XM_047080   |
| DKFZp586M0723              | AL050227    |
| DPYD                       | NM_000110   |
| DR4                        | NM_003844   |
| DR5                        | NM_003842   |
| EGFR                       | NM_005228   |
| EGFRd27                    | EGFRd27     |
| EIF4E                      | NM_001968   |
| EIF4EL3                    | NM_004846   |
| EMS1                       | NM_005231   |
| EpCAM                      | NM_002354   |
| EPHX1                      | NM_000120   |
| ErbB3                      | NM_001982   |
| EREG                       | NM_001432   |
| EstR1                      | NM_000125   |
| fas                        | NM_000043   |
| fasl                       | NM_000639   |
| FBXO5                      | NM_012177   |
| FGF18                      | NM_003862   |
| FGF2                       | NM_002006   |
| FGFR1                      | NM_023109   |
| FHIT                       | NM_002012   |
| FKBP4                      | NM_002014   |
| FLJ20354 (DEPDC1 official) | NM_017779   |
| FLT1                       | NM_002019   |
| FOXM1                      | NM_021953   |
| FRP1                       | NM_003012   |
| G-Catenin                  | NM_002230   |
| GAPDH                      | NM_002046   |
| GATA3                      | NM_002051   |
| GCLC                       | NM_001498   |
| GPC3                       | NM_004484   |
| GRB7                       | NM_005310   |

|                |           |
|----------------|-----------|
| GRO1           | NM_001511 |
| GSN            | NM_000177 |
| GSTM1          | NM_000561 |
| GSTM3          | NM_000849 |
| GSTp           | NM_000852 |
| GUS            | NM_000181 |
| HB-EGF         | NM_001945 |
| hENT1          | NM_004955 |
| HER2           | NM_004448 |
| HGF            | M29145    |
| HIF1A          | NM_001530 |
| HLA-DPB1       | NM_002121 |
| HLA-G          | NM_002127 |
| HNF3A          | NM_004496 |
| HNRPAB         | NM_004499 |
| ID1            | NM_002165 |
| ID2            | NM_002166 |
| IGF1           | NM_000618 |
| IGF1R          | NM_000875 |
| IGFBP2         | NM_000597 |
| IGFBP3         | NM_000598 |
| IGFBP5         | NM_000599 |
| IL6            | NM_000600 |
| ILT-2          | NM_006669 |
| IRS1           | NM_005544 |
| ITGA7          | NM_002206 |
| KDR            | NM_002253 |
| Ki-67          | NM_002417 |
| KIAA1209       | AJ420468  |
| KLK10          | NM_002776 |
| KNSL2          | BC000712  |
| KRT14          | NM_000526 |
| KRT17          | NM_000422 |
| KRT18          | NM_000224 |
| KRT19          | NM_002276 |
| KRT5           | NM_000424 |
| KRT8           | NM_002273 |
| LAMC2          | NM_005562 |
| LMNB1          | NM_005573 |
| LOT1 variant 1 | NM_002656 |
| LPL            | NM_000237 |
| Maspin         | NM_002639 |
| MCM2           | NM_004526 |
| MCM3           | NM_002388 |
| MCM6           | NM_005915 |
| MCP1           | NM_002982 |
| MDM2           | NM_002392 |
| MDSO28         | NM_018463 |
| MELK           | NM_014791 |
| MMP12          | NM_002426 |
| MMP2           | NM_004530 |
| MMP9           | NM_004994 |
| MT3            | NM_005954 |

|                        |           |
|------------------------|-----------|
| MTA1                   | NM_004689 |
| MVP                    | NM_017458 |
| MYBL2                  | NM_002466 |
| MYH11                  | NM_002474 |
| MYLK                   | NM_053025 |
| MYRIP                  | NM_015460 |
| NEK2                   | NM_002497 |
| NFKBp65                | NM_021975 |
| NME1                   | NM_000269 |
| NMU                    | NM_006681 |
| NMYC                   | NM_005378 |
| NPD009 (ABAT official) | NM_020686 |
| NR4A1                  | NM_002135 |
| ODC1                   | NM_002539 |
| p14ARF                 | NM_000077 |
| p14ARF                 | S78535    |
| p21                    | NM_000389 |
| p27                    | NM_004064 |
| P40                    | NM_006824 |
| P53                    | NM_000546 |
| PAI1                   | NM_000602 |
| PCNA                   | NM_002592 |
| PDGFA                  | NM_002607 |
| PDGFB                  | NM_002608 |
| PDGFRa                 | NM_006206 |
| PDGFRb                 | NM_002609 |
| PI3KC2A                | NM_002645 |
| Pin1                   | NM_006221 |
| PLAUR                  | NM_002659 |
| PPM1D                  | NM_003620 |
| PR                     | NM_000926 |
| PRAME                  | NM_006115 |
| PREP                   | NM_002726 |
| PRO2000                | NM_014109 |
| pS2                    | NM_003225 |
| PTEN                   | NM_000314 |
| PTTG1                  | NM_004219 |
| RAB27B                 | NM_004163 |
| RAD51C                 | NM_058216 |
| RAD54L                 | NM_003579 |
| RARA                   | NM_000964 |
| RASSF1                 | NM_007182 |
| RB1                    | NM_000321 |
| RBM5                   | NM_005778 |
| RBP4                   | NM_006744 |
| RFC                    | NM_003056 |
| rhoC                   | NM_005167 |
| RIZ1                   | NM_012231 |
| RPLPO                  | NM_001002 |
| RPS6KB1                | NM_003161 |
| RUNX1                  | NM_001754 |
| SNRPF                  | NM_003095 |
| STK15                  | NM_003600 |

|         |           |
|---------|-----------|
| STMY3   | NM_005940 |
| SURV    | NM_001168 |
| TBP     | NM_003194 |
| TERC    | U86046    |
| TERT    | NM_003219 |
| TFRC    | NM_003234 |
| TGFA    | NM_003236 |
| TGFB3   | NM_003239 |
| TGFBR2  | NM_003242 |
| TIMP1   | NM_003254 |
| TIMP2   | NM_003255 |
| TIMP3   | NM_000362 |
| TJP1    | NM_003257 |
| TK1     | NM_003258 |
| TOP2A   | NM_001067 |
| TOP2B   | NM_001068 |
| TP      | NM_001953 |
| TP53BP1 | NM_005657 |
| TP53BP2 | NM_005426 |
| TRAIL   | NM_003810 |
| TS      | NM_001071 |
| TULP3   | NM_003324 |
| upa     | NM_002658 |
| VDR     | NM_000376 |
| VEGF    | NM_003376 |
| VEGFB   | NM_003377 |
| VEGFC   | NM_005429 |
| VIM     | NM_003380 |
| WISP1   | NM_003882 |
| XIAP    | NM_001167 |
| YB-1    | NM_004559 |
| ZNF217  | NM_006526 |

Third, we performed three independent breast cancer clinical studies in a total of 447 patients to test the relationship between the expression of the 250 candidate genes and recurrence (24-26). We reasoned that in any single gene expression study a considerable number of the genes may correlate with the outcome as a result of chance alone. To identify true positives, we performed the three independent studies to identify whether expression of any of the 250 candidate genes correlated with recurrence across

the studies. We hypothesized that the genes most highly correlated with recurrence would survive evaluation across diverse patients and treatments, and selected heterogeneous populations for development of the gene list:

**Table.** Three Breast Cancer Studies to Develop the Gene Panel and Algorithm for Prospective Validation

| Site                                           | N                         | Adjuvant Treatment        |            |
|------------------------------------------------|---------------------------|---------------------------|------------|
| NSABP Study B-20<br>Pittsburgh, PA             | 233<br>Node -<br>ER+      | Tamoxifen<br>Chemotherapy | 100%<br>0% |
| Rush University Medical Center<br>Chicago, IL  | 78<br>≥ 10 nodes<br>ER+/- | Tamoxifen<br>Chemotherapy | 54%<br>80% |
| Providence St. Josephs Hospital<br>Burbank, CA | 136<br>Node +/-<br>ER+/-  | Tamoxifen<br>Chemotherapy | 41%<br>39% |

There were 9 genes whose expression correlated with recurrence in all three studies at an unadjusted p-value < 0.05. There were 5 additional genes whose expression correlated with outcome in all three studies at an unadjusted p-value < 0.10. There were an additional 9 genes whose expression correlated with outcome in 2 studies at an unadjusted p-value < 0.05.

Fourth, we used the results from these three preliminary studies to select the final gene panel and to design an algorithm to compute a Recurrence Score (RS) for each tumor sample. Since we planned to validate the Recurrence Score in the large

homogeneous population of NSABP B-14 tamoxifen-treated patients, we weighted the NSABP B-20 study results most heavily in selecting the final gene list and algorithm for validation. Genes that were consistently significant across multiple studies provided the basis for developing of the Recurrence Score model. Analyses were then performed to determine the functional forms of the variables to include in that model and the appropriate number of terms to include in the model. We did not assume that linear relationships would be appropriate for all genes, and explored non-linear relationships. For this purpose, we used correlation analysis, dimension reduction, Martingale residual analysis, concordance measures of accuracy, and bootstrap resampling (to be published in detail separately).

The correlation of the expression of the genes with respect to each other was analyzed by unsupervised cluster analysis and by principal component analysis. A number of groups were identified—a proliferation group, including genes such as Ki-67 and Cyclin B1, an ER group, including genes such as ER and PR, a HER2 group, including HER2 and GRB7, and an invasion group, including genes such as Stromolysin 3 and Cathepsin L2. The selection of the final 16 cancer-related genes was based

primarily on the strength of their performance across all three studies and the consistency of primer/probe performance in the assay.

The consistency between the results of the RT-PCR analysis in the NSABP B-20 samples that were used to develop the Recurrence Score and the results in the NSABP B-14 samples where the Recurrence Score was validated is notable. Shown below are forest plots of the Kaplan-Meier estimate for the Hazard Ratios for all 16 cancer-related genes in both studies. The 95% confidence intervals for the Hazard Ratios for all the individual genes overlap between studies.

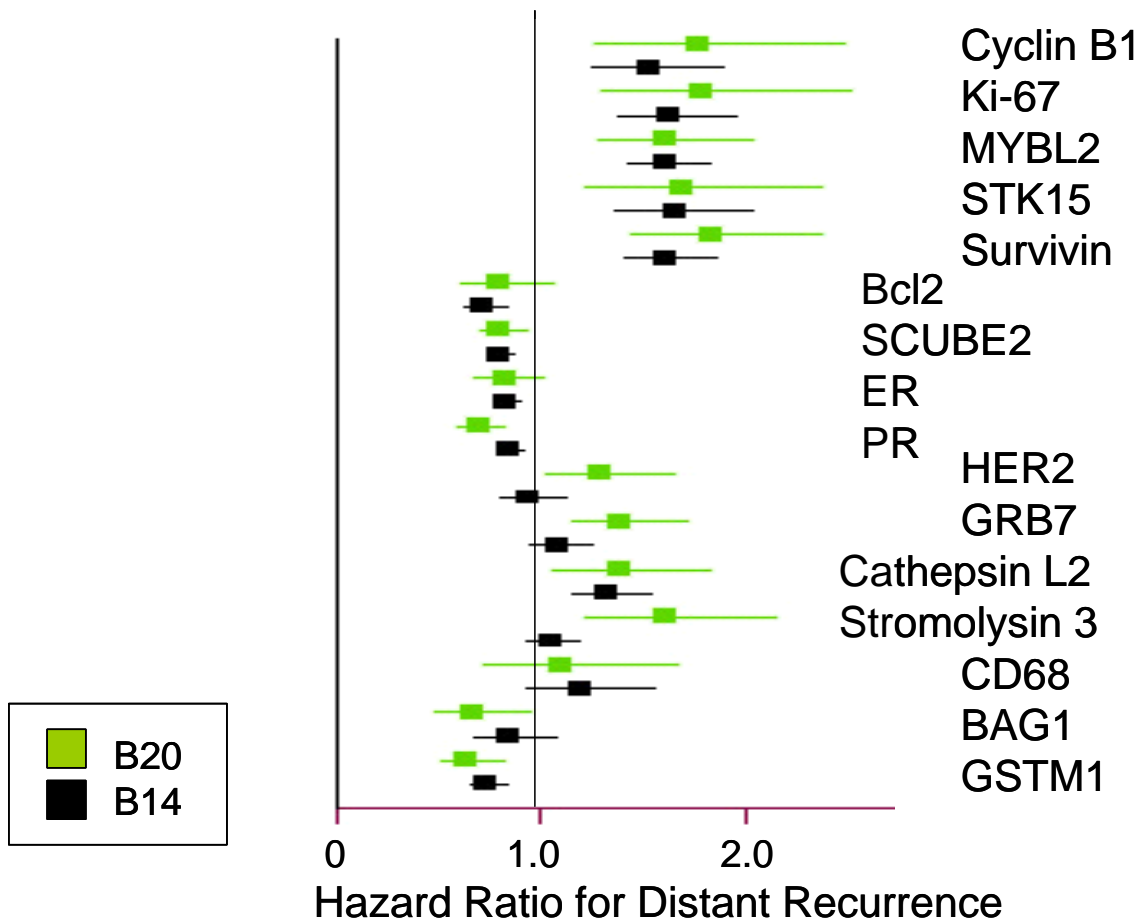

Moreover, consistency between the B-20 and the B-14 studies was also observed

the hazard ratios for the proliferation, the ER, the HER2, and the invasion groups were compared.

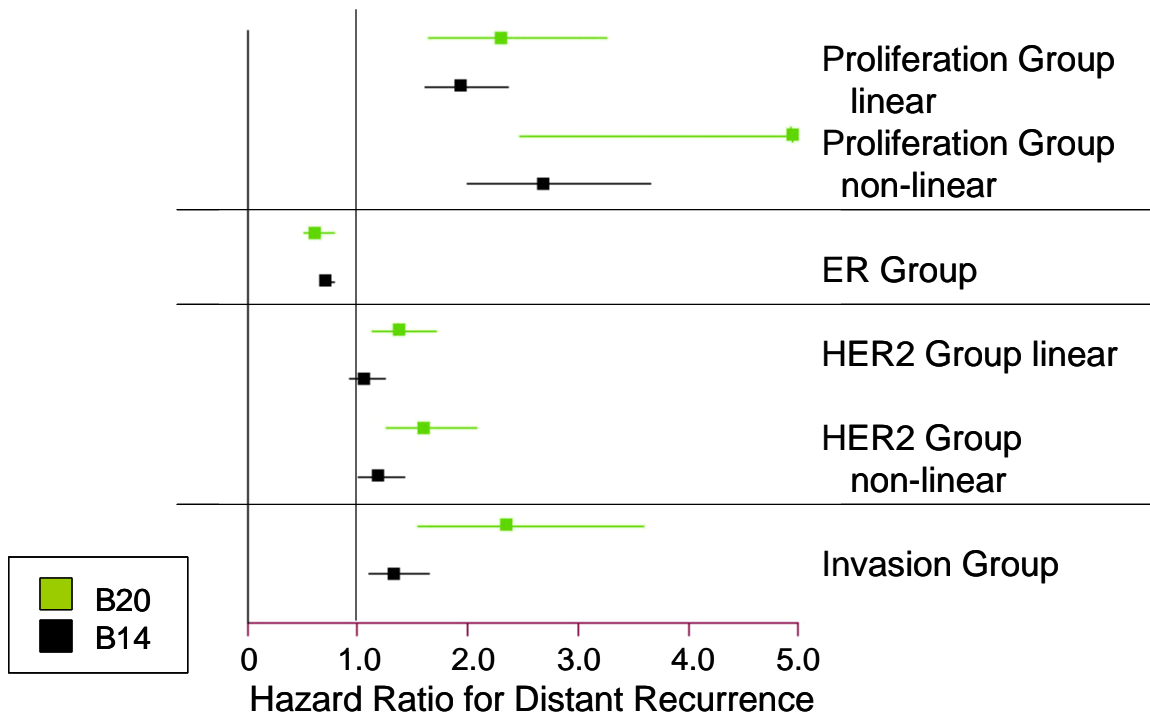

The predictive power of the gene groups is greater than that of individual genes.

Figure in Supplemental Background and Methods – Section 2

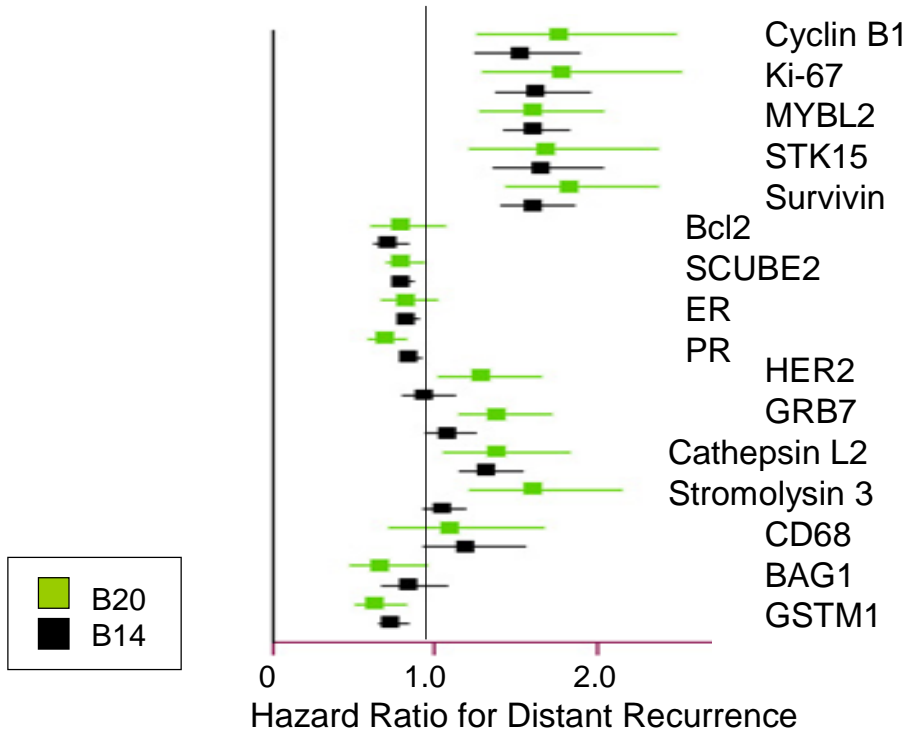

Figure in Supplemental Background and Methods – Section 2

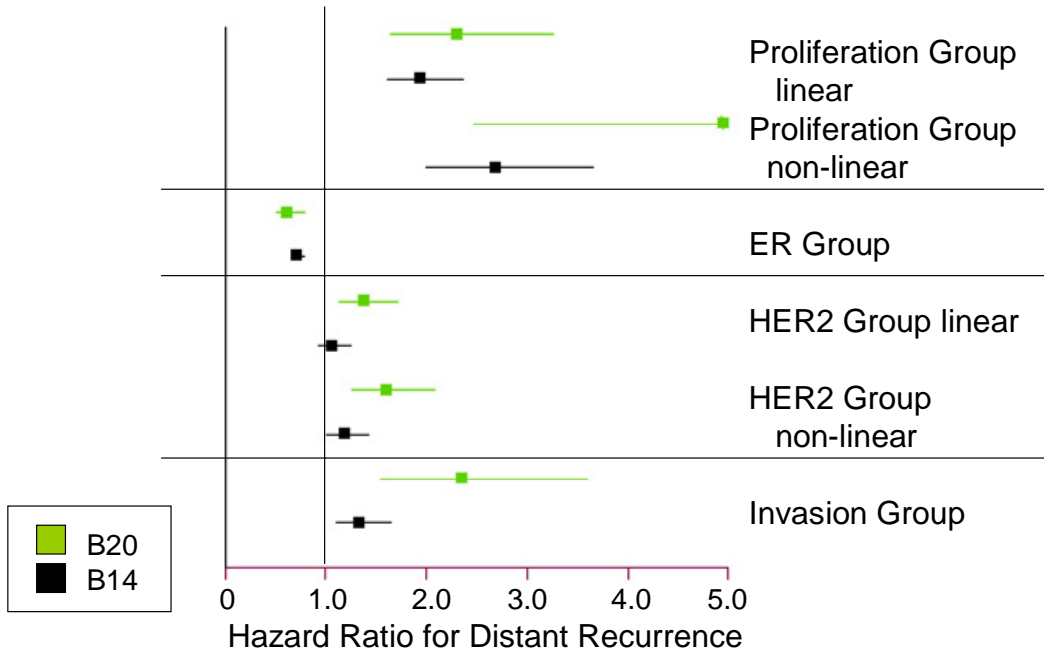

## Supplementary Tables and Figures

Supplementary Table 1. Patient Characteristics

| <b>Table 1.</b> Baseline Characteristics of the 668 Patients Included in the Analysis |                                     |                                             |                                              |
|---------------------------------------------------------------------------------------|-------------------------------------|---------------------------------------------|----------------------------------------------|
| Characteristic                                                                        | Genomic Health Population (N = 668) | Remaining TAM-treated population (N = 1949) | NSABP B-14 TAM-treated population (N = 2617) |
| <b>Treatment</b>                                                                      |                                     |                                             |                                              |
| Randomized Pts                                                                        | 290 (43%)                           | 1114 (57%)                                  | 1404 (54%)                                   |
| Registered Pts                                                                        | 378 (57%)                           | 835 (43%)                                   | 1213 (46%)                                   |
| <b>Age at Enrollment**</b>                                                            |                                     |                                             |                                              |
| < 50 yr of age                                                                        | 194 (29%)                           | 618 (32%)                                   | 812 (31%)                                    |
| 50 ≤ age < 60                                                                         | 173 (26%)                           | 583 (30%)                                   | 756 (29%)                                    |
| ≥ 60 yr of age                                                                        | 301 (45%)                           | 748 (38%)                                   | 1049 (40%)                                   |
| <b>Race</b>                                                                           |                                     |                                             |                                              |
| White                                                                                 | 615 (92%)                           | 1763 (90%)                                  | 2378 (91%)                                   |
| Black                                                                                 | 31 (5%)                             | 87 (5%)                                     | 118 (4%)                                     |
| Others                                                                                | 22 (3%)                             | 99 (5%)                                     | 121 (5%)                                     |
| <b>Clinical Tumor Size</b>                                                            |                                     |                                             |                                              |
| 0 – 1.0 cm                                                                            | 109 (16%)                           | 366 (19%)                                   | 475 (18%)                                    |
| 1.1 – 2.0 cm                                                                          | 305 (46%)                           | 877 (45%)                                   | 1182 (45%)                                   |
| 2.1 – 4.0 cm                                                                          | 220 (33%)                           | 635 (32%)                                   | 855 (33%)                                    |
| 4.1+ cm                                                                               | 34 (5%)                             | 71 (4%)                                     | 105 (4%)                                     |

\*\* Likelihood Ratio test significant at p-Value < 0.01

Supplementary Table 2. Tumor Grade and Distant Recurrence for Three Pathologists

| <b>Supplementary Table 2A.</b> Multivariate Cox-Proportional Model for Tumor Grade (Pathologist A) and Recurrence Score |               |              |                           |
|-------------------------------------------------------------------------------------------------------------------------|---------------|--------------|---------------------------|
| Without Recurrence Score                                                                                                |               |              |                           |
| Variable                                                                                                                | Pr > $\chi^2$ | Hazard Ratio | 95% C.I. for Hazard Ratio |
| Moderate <sup>1</sup>                                                                                                   | 0.04          | 1.84         | (1.04, 3.25)              |
| Poor <sup>1</sup>                                                                                                       | <0.001        | 5.40         | (3.12, 9.35)              |
| With Recurrence Score                                                                                                   |               |              |                           |
| Variable                                                                                                                | Pr > $\chi^2$ | Hazard Ratio | 95% C.I. for Hazard Ratio |
| Moderate <sup>1</sup>                                                                                                   | 0.15          | 1.54         | (0.86, 2.74)              |
| Poor <sup>1</sup>                                                                                                       | <0.001        | 3.42         | (1.86, 6.29)              |
| Recurrence Score <sup>2</sup>                                                                                           | <0.001        | 2.27         | (1.51, 3.41)              |
| Likelihood Ratio Test for Recurrence Score and Tumor Grade versus Tumor Grade Alone $\chi_1^2 = 14.3, p < 0.001$        |               |              |                           |

<sup>1</sup> Grade used as binary factors, poor relative to well and moderate relative to well.

<sup>2</sup> Recurrence Score used as a continuous variable, with HR for distant recurrence relative to an increment of 50 units.

| <b>Supplementary Table 2B.</b> Multivariate Cox-Proportional Model for Tumor Grade (Pathologist B) and Recurrence Score |               |              |                           |
|-------------------------------------------------------------------------------------------------------------------------|---------------|--------------|---------------------------|
| Without Recurrence Score                                                                                                |               |              |                           |
| Variable                                                                                                                | Pr > $\chi^2$ | Hazard Ratio | 95% C.I. for Hazard Ratio |
| Moderate <sup>1</sup>                                                                                                   | 0.12          | 1.72         | (0.88, 3.37)              |
| Poor <sup>1</sup>                                                                                                       | <0.001        | 7.20         | (3.61, 14.36)             |
| With Recurrence Score                                                                                                   |               |              |                           |
| Variable                                                                                                                | Pr > $\chi^2$ | Hazard Ratio | 95% C.I. for Hazard Ratio |
| Moderate <sup>1</sup>                                                                                                   | 0.23          | 1.51         | (0.77, 2.98)              |
| Poor <sup>1</sup>                                                                                                       | <0.001        | 4.34         | (2.03, 9.25)              |
| Recurrence Score <sup>2</sup>                                                                                           | <0.001        | 2.12         | (1.38, 3.25)              |
| Likelihood Ratio Test for Recurrence Score and Tumor Grade versus Tumor Grade Alone $\chi_1^2 = 10.9, p < 0.001$        |               |              |                           |

<sup>1</sup> Grade used as binary factors, poor relative to well and moderate relative to well.

<sup>2</sup> Recurrence Score used as a continuous variable, with HR for distant recurrence relative to an increment of 50 units.

| <b>Supplementary Table 2C.</b> Multivariate Cox-Proportional Model for Tumor Grade (Pathologist C) and Recurrence Score |               |              |                           |
|-------------------------------------------------------------------------------------------------------------------------|---------------|--------------|---------------------------|
| Without Recurrence Score                                                                                                |               |              |                           |
| Variable                                                                                                                | Pr > $\chi^2$ | Hazard Ratio | 95% C.I. for Hazard Ratio |
| Moderate <sup>1</sup>                                                                                                   | 0.25          | 1.49         | (0.76, 2.93)              |
| Poor <sup>1</sup>                                                                                                       | <0.001        | 3.73         | (1.88, 7.42)              |
| With Recurrence Score                                                                                                   |               |              |                           |
| Variable                                                                                                                | Pr > $\chi^2$ | Hazard Ratio | 95% C.I. for Hazard Ratio |
| Moderate <sup>1</sup>                                                                                                   | 0.56          | 1.23         | (0.62, 2.43)              |
| Poor <sup>1</sup>                                                                                                       | 0.06          | 2.02         | (0.96, 4.24)              |
| Recurrence Score <sup>2</sup>                                                                                           | <0.001        | 2.83         | (1.88, 4.24)              |
| Likelihood Ratio Test for Recurrence Score and Tumor Grade versus Tumor Grade Alone $\chi_1^2 = 22.4, p < 0.001$        |               |              |                           |

<sup>1</sup> Grade used as binary factors, poor relative to well and moderate relative to well.

<sup>2</sup> Recurrence Score used as a continuous variable, with HR for distant recurrence relative to an increment of 50 units.

Recurrence score provides significant ( $p < 0.001$ ) information beyond tumor grade (Pathologist provided the “middle” prognostic assessment of tumor grade).

Supplementary Table 3. Pairwise Comparison of Assessments of Tumor Grade by Three Pathologists.

| Supplementary <b>Table 3A.</b> Pairwise Comparison of Assessments of Tumor Grade |          |               |            |           |       |
|----------------------------------------------------------------------------------|----------|---------------|------------|-----------|-------|
| Pathologist A vs Pathologist B                                                   |          |               |            |           |       |
|                                                                                  |          | Pathologist B |            |           |       |
|                                                                                  |          | Well          | Moderate   | Poor      | Total |
| Pathologist A                                                                    | Well     | <b>105</b>    | <b>114</b> | <b>5</b>  | 224   |
|                                                                                  | Moderate | <b>24</b>     | <b>241</b> | <b>31</b> | 296   |
|                                                                                  | Poor     | <b>3</b>      | <b>82</b>  | <b>63</b> | 148   |
|                                                                                  | Total    | 132           | 437        | 99        | 668   |
| Concordance = 61%; Kappa = 0.37 (0.31, 0.42)                                     |          |               |            |           |       |

| Supplementary <b>Table 3B.</b> Pairwise Comparison of Assessments of Tumor Grade |          |               |            |           |       |
|----------------------------------------------------------------------------------|----------|---------------|------------|-----------|-------|
| Pathologist C vs Pathologist A                                                   |          |               |            |           |       |
|                                                                                  |          | Pathologist A |            |           |       |
|                                                                                  |          | Well          | Moderate   | Poor      | Total |
| Pathologist C                                                                    | Well     | <b>76</b>     | <b>31</b>  | <b>0</b>  | 107   |
|                                                                                  | Moderate | <b>140</b>    | <b>221</b> | <b>52</b> | 413   |
|                                                                                  | Poor     | <b>8</b>      | <b>44</b>  | <b>96</b> | 148   |
|                                                                                  | Total    | 224           | 296        | 148       | 668   |
| Concordance = 59%; Kappa = 0.34 (0.28, 0.40)                                     |          |               |            |           |       |

| Supplementary <b>Table 3C.</b> Pairwise Comparison of Assessments of Tumor Grade |          |               |            |           |       |
|----------------------------------------------------------------------------------|----------|---------------|------------|-----------|-------|
| Pathologist C vs Pathologist B                                                   |          |               |            |           |       |
|                                                                                  |          | Pathologist B |            |           |       |
|                                                                                  |          | Well          | Moderate   | Poor      | Total |
| Pathologist C                                                                    | Well     | <b>56</b>     | <b>50</b>  | <b>1</b>  | 107   |
|                                                                                  | Moderate | <b>74</b>     | <b>309</b> | <b>30</b> | 413   |
|                                                                                  | Poor     | <b>2</b>      | <b>78</b>  | <b>68</b> | 148   |
|                                                                                  | Total    | 132           | 437        | 99        | 668   |
| Concordance = 65%; Kappa = 0.34 (0.27, 0.40)                                     |          |               |            |           |       |

The overall agreement in tumor grade among the three pathologists is 43%

Supplementary Figure 1A and 1B. Kaplan-Meier Plots of DRFI for ER and PR by the Ligand Binding Assay.

Supplementary Figure 1A. ER by the Ligand Binding Assay and DRFI

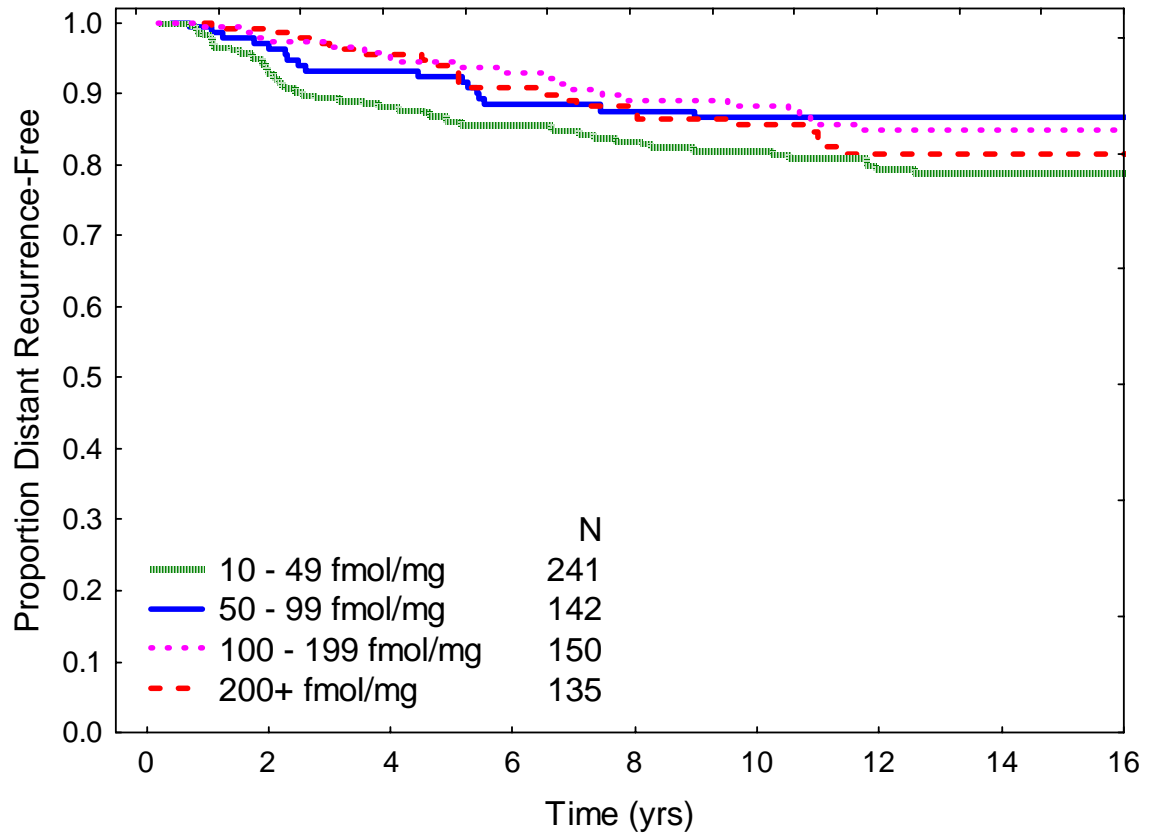

Supplementary Figure 1B. PR by the Ligand Binding Assay and DRFI

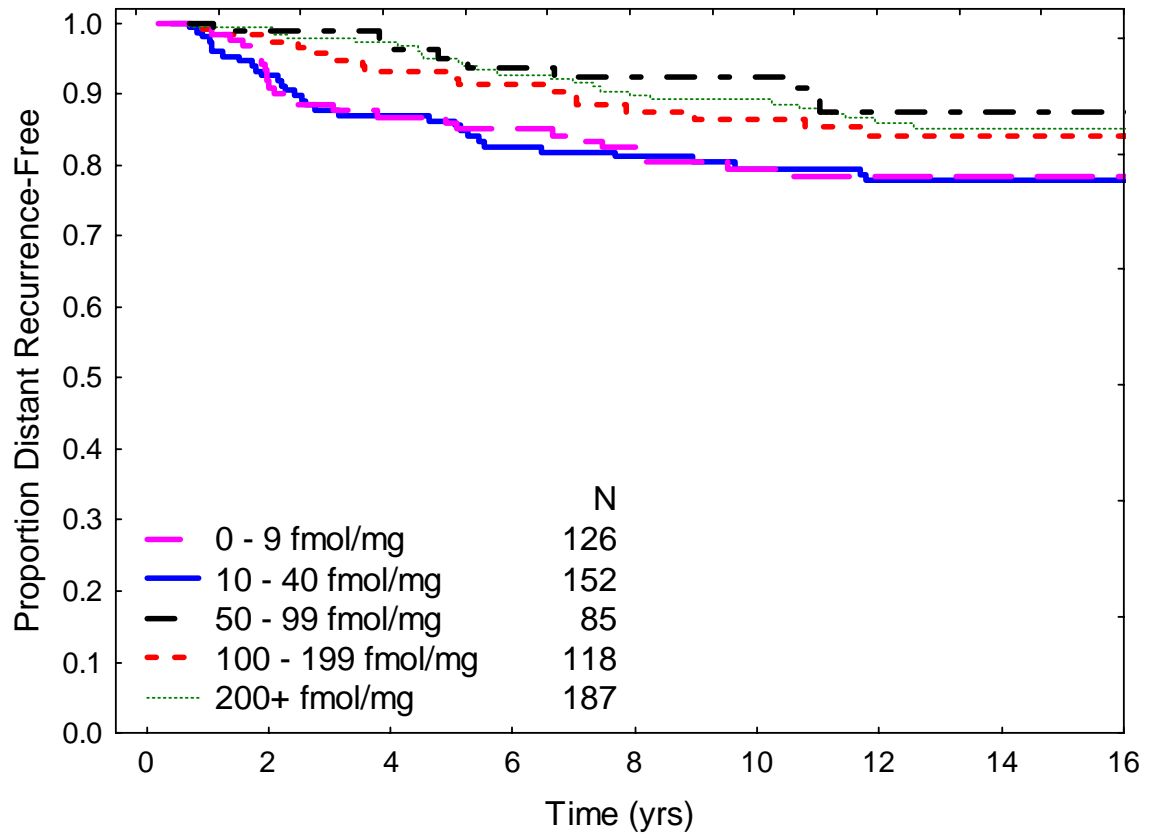

Supplementary Figure 2A. Kaplan-Meier Plot of DRFI for HER2 amplification by FISH.

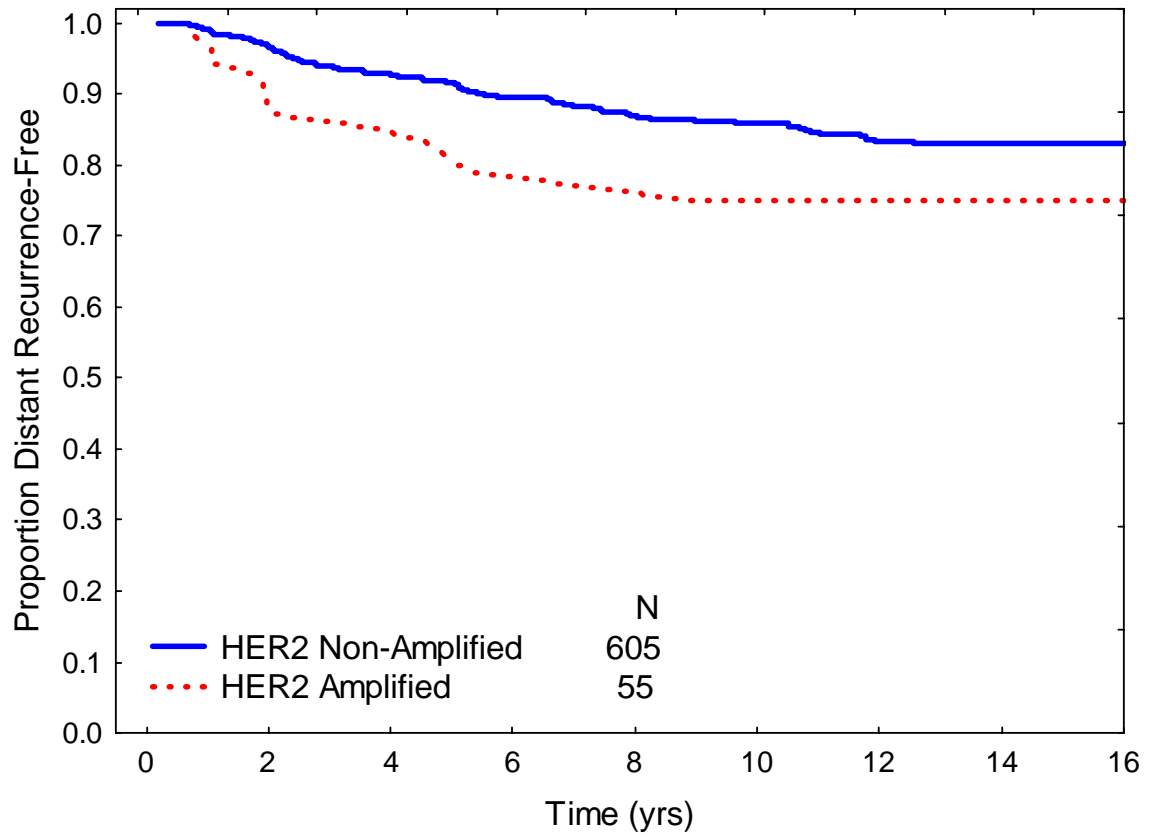

Supplementary Figure 2B. Recurrence Score Categories and Relapse-Free Interval.

The difference between groups is significant ( $P < 0.001$ ).

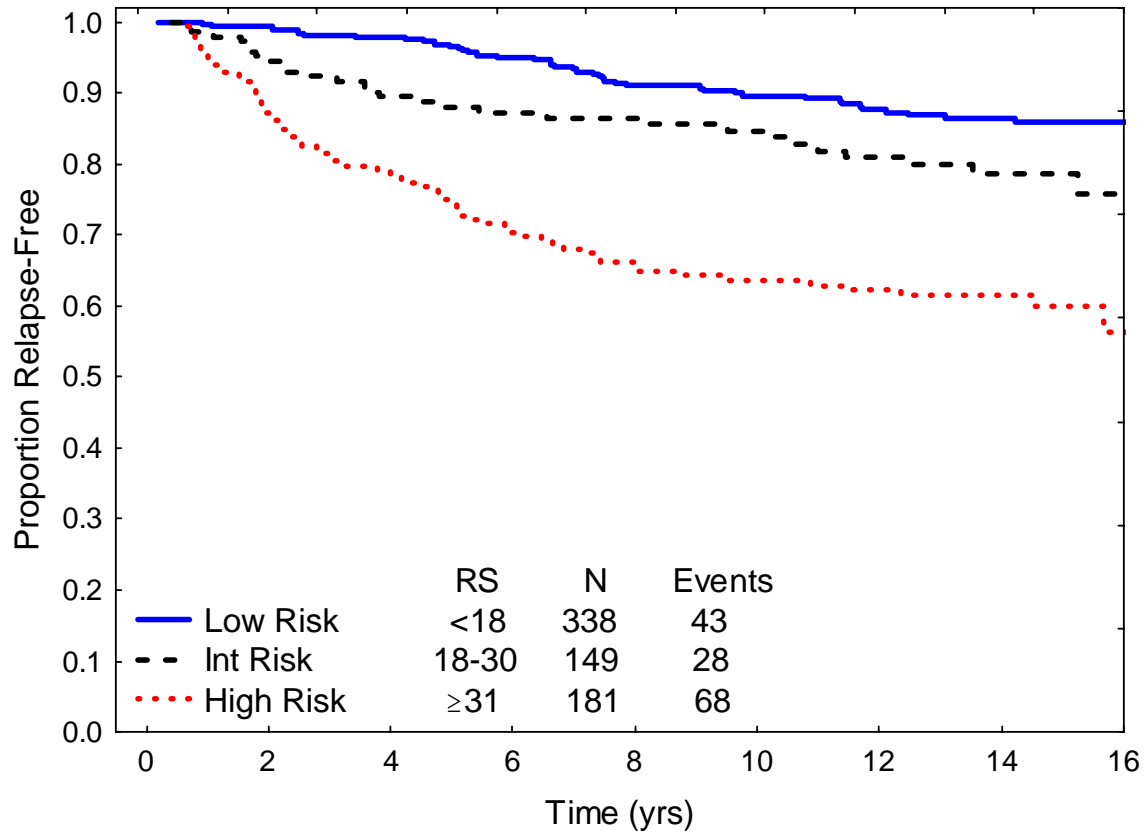

Number at Risk

|      |     |     |     |     |     |     |     |     |    |
|------|-----|-----|-----|-----|-----|-----|-----|-----|----|
| Low  | 338 | 328 | 313 | 298 | 276 | 258 | 231 | 170 | 38 |
| Int  | 149 | 139 | 128 | 116 | 104 | 96  | 80  | 66  | 16 |
| High | 181 | 154 | 137 | 119 | 105 | 91  | 83  | 63  | 13 |

Supplementary Figure 2C. Recurrence Score Categories and Overall Survival.

The difference between groups is significant ( $P < 0.001$ ).

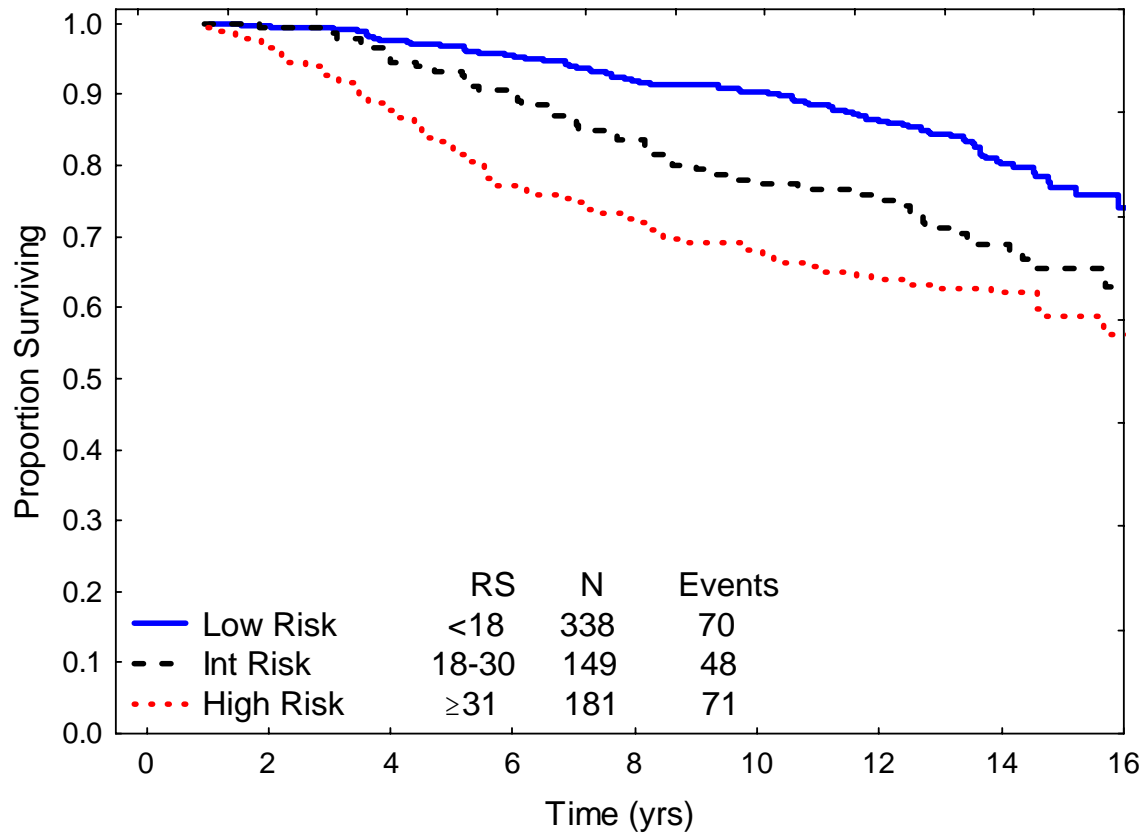

Number at Risk

|      |     |     |     |     |     |     |     |     |    |
|------|-----|-----|-----|-----|-----|-----|-----|-----|----|
| Low  | 338 | 328 | 313 | 298 | 276 | 258 | 231 | 170 | 38 |
| Int  | 149 | 139 | 128 | 116 | 104 | 96  | 80  | 66  | 16 |
| High | 181 | 154 | 137 | 119 | 105 | 91  | 83  | 63  | 13 |

Supplementary Figure 3. 10 year Kaplan-Meier estimates and 95% confidence intervals for the percent of patients distant recurrence-free for tumor grade subgroups.

Supplementary Figure 3A. Tumor Grade Subgroups for Pathologist B

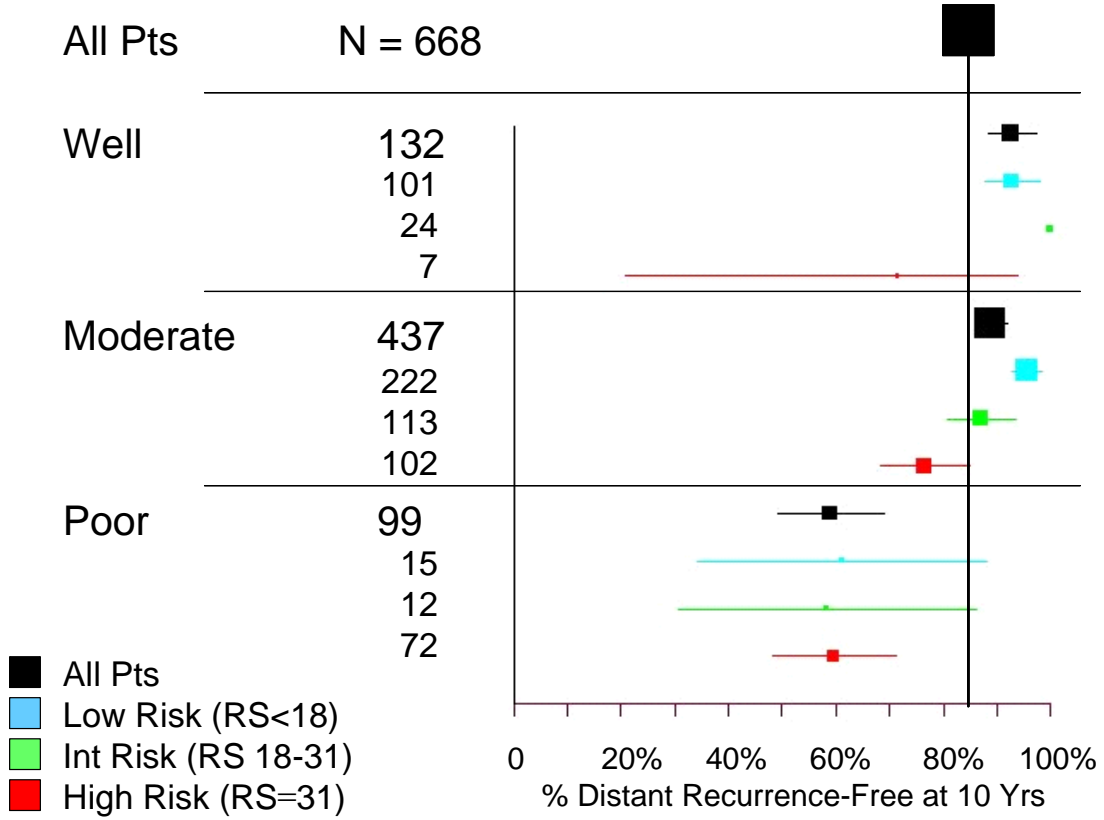

Supplementary Figure 3B. Tumor Grade Subgroups for Pathologist C

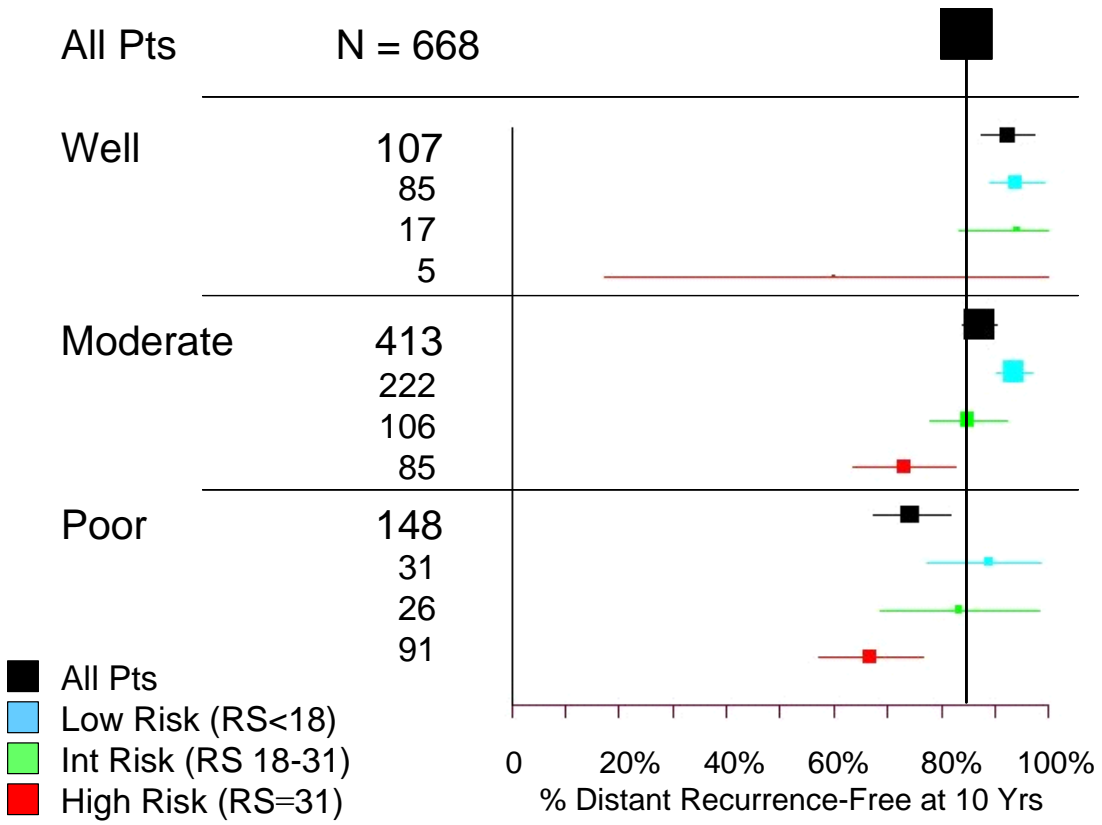

Supplement: nejmoa041588sa1.pdf [file nejmoa041588sa1.pdf]
